# Supplementary material
Source: Springer Nature journal article supplement (https://www.springermedizin.de/resource/supplementary/13058_2012_3169_MOESM9_ESM.pdf/9703428)

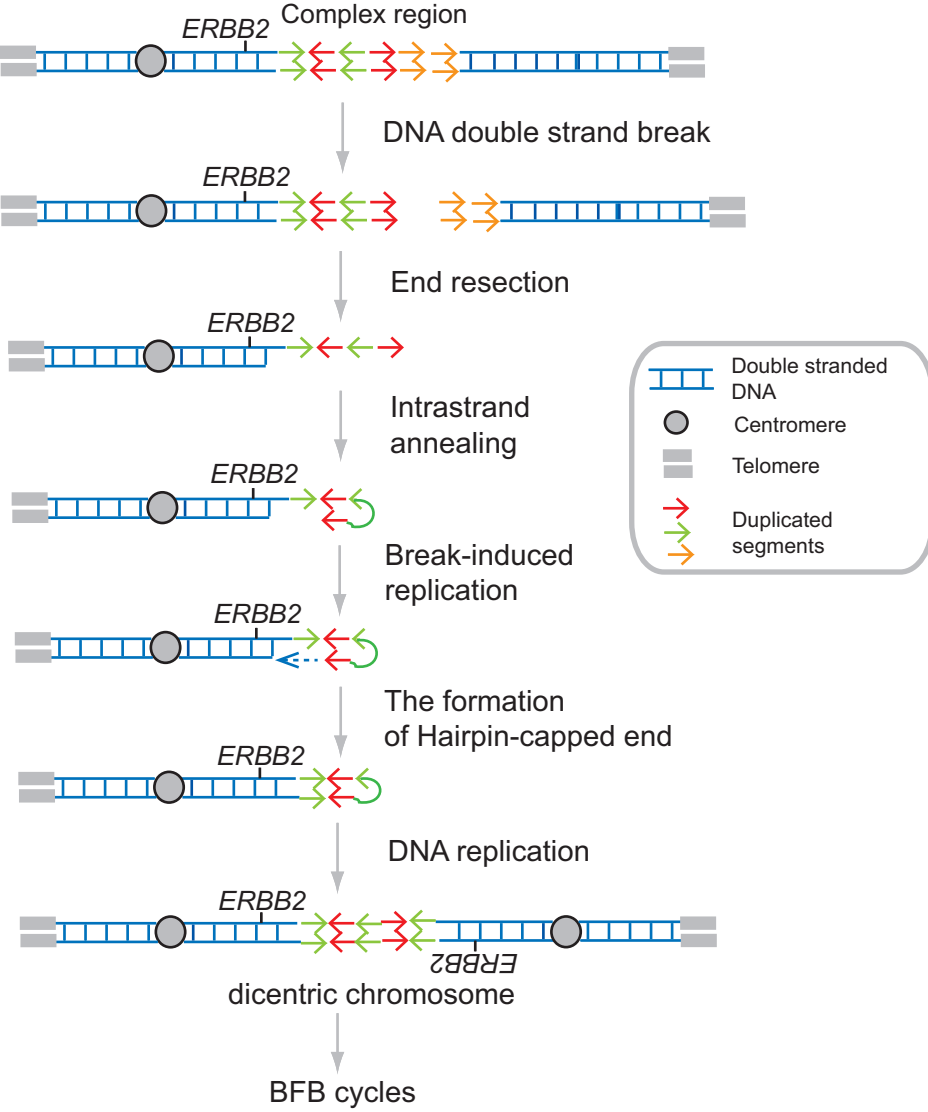

Supplement: MOESM9 [file 9703428]
